# Supplementary material for: Beneficial Effects of Oral Nutrition Supplements on the Nutritional Status and Physical Performance of Older Nursing Home Residents at Risk of Malnutrition
Source: MDPI journal article supplement (doi:10.3390/nu15194291), 2023-10-08
Supplement: s1 [file s1]

Supplementary Table S1. Effects of nutritional supplement drink (NSD) on body composition, physical performance, nutritional status, and nutrition intake in older nursing home residents at risk of malnutrition

| NSD (N=57)                |                |              |              |                      |        |        |               |               |               | NE (N=50)            |       |       |                      |                      |     |            |                      |          |       |
|---------------------------|----------------|--------------|--------------|----------------------|--------|--------|---------------|---------------|---------------|----------------------|-------|-------|----------------------|----------------------|-----|------------|----------------------|----------|-------|
|                           | <i>p</i> value |              |              |                      |        |        |               |               |               | <i>p</i> value       |       |       |                      |                      |     |            |                      |          |       |
|                           | Baseline       |              |              | 6 <sup>th</sup> week |        |        | End           |               |               | Baseline×            |       |       | 6 <sup>th</sup> week |                      |     | Baseline   |                      |          |       |
|                           |                |              |              |                      |        |        |               |               |               | 6 <sup>th</sup> week | × End | × End | Baseline             | 6 <sup>th</sup> week | End | Baseline × | 6 <sup>th</sup> week | Baseline |       |
| 6 <sup>th</sup> week      |                |              |              |                      |        |        |               |               |               |                      |       |       |                      |                      |     |            |                      | × End    | × End |
| Body composition          |                |              |              |                      |        |        |               |               |               |                      |       |       |                      |                      |     |            |                      |          |       |
| Body weight (kg)          | 53.73 ± 8.31   | 54.73 ± 8.28 | 54.94 ± 8.50 | 0.002                | 0.513  | <0.001 | 62.91 ± 13.57 | 63.07 ± 13.47 | 62.73 ± 12.67 | 0.304                | 0.200 | 0.574 |                      |                      |     |            |                      |          |       |
| BMI (kg/m <sup>2</sup> )  | 20.47 ± 3.03   | 20.84 ± 3.20 | 20.97 ± 3.03 | 0.013                | 0.375  | <0.001 | 23.74 ± 4.30  | 23.81 ± 4.29  | 23.67 ± 3.98  | 0.252                | 0.211 | 0.603 |                      |                      |     |            |                      |          |       |
| Body fat (%)              | 25.97 ± 5.92   | 26.25 ± 6.54 | 26.58 ± 6.13 | 0.413                | 0.490  | 0.273  | 27.03 ± 5.08  | 27.12 ± 4.42  | 27.43 ± 4.16  | 0.786                | 0.456 | 0.356 |                      |                      |     |            |                      |          |       |
| Muscle mass (%)           | 26.31 ± 3.03   | 26.19 ± 3.19 | 26.15 ± 3.13 | 0.381                | 0.840  | 0.499  | 26.81 ± 2.81  | 26.62 ± 2.93  | 26.49 ± 2.92  | 0.145                | 0.667 | 0.313 |                      |                      |     |            |                      |          |       |
| ASMI (kg/m <sup>2</sup> ) | 5.38 ± 0.95    | 5.45 ± 0.94  | 5.46 ± 0.97  | 0.123                | 0.799  | 0.189  | 6.38 ± 1.38   | 6.35 ± 1.40   | 6.30 ± 1.33   | 0.272                | 0.494 | 0.263 |                      |                      |     |            |                      |          |       |
| Calf circumference (cm)   | 31.98 ± 3.40   | 32.18 ± 2.78 | 32.14 ± 3.01 | 0.299                | 0.529  | 0.842  | 32.95 ± 4.05  | 32.76 ± 4.15  | 32.57 ± 3.91  | 0.025                | 0.343 | 0.065 |                      |                      |     |            |                      |          |       |
| Physical performance      |                |              |              |                      |        |        |               |               |               |                      |       |       |                      |                      |     |            |                      |          |       |
| SOF                       | 0.98 ± 0.64    | 0.46 ± 0.63  | 0.23 ± 0.42  | <0.001               | 0.001  | <0.001 | 0.50 ± 0.61   | 0.44 ± 0.54   | 0.56 ± 0.58   | 0.083                | 0.014 | 0.180 |                      |                      |     |            |                      |          |       |
| Grip strength (kg)        | 21.66 ± 6.14   | 22.78 ± 6.11 | 21.97 ± 6.21 | 0.002                | 0.109  | 0.481  | 21.64 ± 8.09  | 21.69 ± 7.48  | 21.88 ± 7.74  | 0.916                | 0.51  | 0.621 |                      |                      |     |            |                      |          |       |
| 6-m walking speed (s)     | 10.02 ± 5.04   | 9.20 ± 4.65  | 8.56 ± 4.79  | 0.005                | 0.020  | 0.001  | 7.71 ± 2.12   | 8.28 ± 2.57   | 8.16 ± 2.89   | 0.061                | 0.722 | 0.111 |                      |                      |     |            |                      |          |       |
| Walking speed (m/s)       | 0.73 ± 0.30    | 0.79 ± 0.31  | 0.89 ± 0.38  | 0.004                | 0.003  | <0.001 | 0.83 ± 0.20   | 0.78 ± 0.19   | 0.83 ± 0.32   | 0.076                | 0.425 | 0.363 |                      |                      |     |            |                      |          |       |
| Blood pressure            |                |              |              |                      |        |        |               |               |               |                      |       |       |                      |                      |     |            |                      |          |       |
| SBP (mmHg)                | 133 ± 17       | 137 ± 16     | 133 ± 15     | 0.121                | 0.021  | 0.857  | 132 ± 17      | 129 ± 14      | 131 ± 14      | 0.102                | 0.355 | 0.251 |                      |                      |     |            |                      |          |       |
| DBP (mmHg)                | 78 ± 11        | 79 ± 9       | 76 ± 8       | 0.218                | 0.002  | 0.079  | 77 ± 10       | 76 ± 9        | 76 ± 9        | 0.459                | 0.791 | 0.574 |                      |                      |     |            |                      |          |       |
| Nutritional status        |                |              |              |                      |        |        |               |               |               |                      |       |       |                      |                      |     |            |                      |          |       |
| MUST                      |                |              |              |                      |        |        |               |               |               |                      |       |       |                      |                      |     |            |                      |          |       |
| 0, <i>n</i> (%)           | 0 (0.0)        | 27 (47.4)    | 34 (59.6)    | <0.001               | 0.4651 | <0.001 | 0 (0.0)       | 1 (1.9)       | 2 (3.8)       | 0.522                | 0.703 | 0.355 |                      |                      |     |            |                      |          |       |
| 1, <i>n</i> (%)           | 37 (64.9)      | 15 (26.3)    | 12 (21.1)    |                      |        |        | 41 (78.8)     | 41 (78.8)     | 40 (76.9)     |                      |       |       |                      |                      |     |            |                      |          |       |
| 2, <i>n</i> (%)           | 10 (17.5)      | 14 (24.6)    | 9 (15.8)     |                      |        |        | 9 (17.3)      | 7 (13.5)      | 8 (15.4)      |                      |       |       |                      |                      |     |            |                      |          |       |
| 3, <i>n</i> (%)           | 10 (17.5)      | 1 (1.8)      | 2 (3.5)      |                      |        |        | 0 (0.0)       | 1 (1.9)       | 0 (0.0)       |                      |       |       |                      |                      |     |            |                      |          |       |
| MNA-SF                    | 9.07 ± 1.83    | 11.12 ± 1.67 | 12.04 ± 1.31 | <0.001               | <0.001 | <0.001 | 10.66 ± 1.92  | 10.82 ± 1.75  | 10.58 ± 1.93  | 0.021                | 0.247 | 0.773 |                      |                      |     |            |                      |          |       |

|                            |                |                |                |        |       |        |                |                |                |       |       |       |
|----------------------------|----------------|----------------|----------------|--------|-------|--------|----------------|----------------|----------------|-------|-------|-------|
| Total energy intake (kcal) | 1213.9 ± 69.53 | 1607.4 ± 72.62 | 1611.8 ± 71.21 | <0.001 | 0.166 | <0.001 | 1219.0 ± 67.68 | 1221.0 ± 56.32 | 1223.0 ± 59.08 | 0.796 | 0.564 | 0.417 |
|----------------------------|----------------|----------------|----------------|--------|-------|--------|----------------|----------------|----------------|-------|-------|-------|

Data are expressed as the mean ± standard deviation. The Shapiro–Wilk test was used to determine the normality of the population. Data were compared by a paired *t*-test, *t*-test, or Wilcoxon signed-rank test. NE, nutritional education; BW, body weight; BMI, body-mass index; ASMI, appendicular skeletal muscle index; SOF, study of osteoporotic fractures; MUST, malnutrition universal screening tool; MNA-SF, Mini-Nutritional Assessment Short Form.

Supplementary Table S2. Effects of nutritional supplement drink (NSD) and nutritional education (NE) on blood biochemical parameters in older nursing home residents at risk of malnutrition

|                                 | NSD      |        |                      |       |          |        |                                 |                |                | NE       |        |                      |        |          |        |                                 |                |                |
|---------------------------------|----------|--------|----------------------|-------|----------|--------|---------------------------------|----------------|----------------|----------|--------|----------------------|--------|----------|--------|---------------------------------|----------------|----------------|
|                                 |          |        |                      |       |          |        |                                 |                |                |          |        |                      |        |          |        |                                 |                |                |
|                                 |          |        |                      |       |          |        |                                 |                |                |          |        |                      |        |          |        |                                 |                |                |
|                                 |          |        |                      |       |          |        | <i>p</i> value                  |                |                |          |        |                      |        |          |        | <i>p</i> value                  |                |                |
|                                 | Baseline |        | 6 <sup>th</sup> week |       | End      |        | Baseline × 6 <sup>th</sup> week | Baseline × End | Baseline × End | Baseline |        | 6 <sup>th</sup> week |        | End      |        | Baseline × 6 <sup>th</sup> week | Baseline × End | Baseline × End |
|                                 |          |        |                      |       |          |        | 6th week                        | × End          | × End          |          |        |                      |        |          |        | 6th week                        | × End          | × End          |
| Blood sugar (AC) (mg/dL)        | 107.42 ± | 49.78  | 115.16 ±             | 40.87 | 114.79 ± | 51.82  | 0.041                           | 0.791          | 0.166          | 109.78 ± | 49.35  | 116.42 ±             | 45.75  | 110.21 ± | 31.79  | 0.004                           | 0.151          | 0.089          |
| <b>Lipid profile</b>            |          |        |                      |       |          |        |                                 |                |                |          |        |                      |        |          |        |                                 |                |                |
| Cholesterol (mg/dL)             | 163.33 ± | 27.05  | 159.90 ±             | 23.74 | 164.39 ± | 28.28  | 0.127                           | 0.082          | 0.694          | 170.62 ± | 40.86  | 167.86 ±             | 38.30  | 164.56 ± | 40.87  | 0.758                           | 0.359          | 0.224          |
| Triglyceride (mg/dL)            | 107.56 ± | 77.30  | 117.60 ±             | 80.65 | 116.07 ± | 78.39  | 0.109                           | 0.996          | 0.269          | 107.72 ± | 52.60  | 124.46 ±             | 74.57  | 139.79 ± | 93.51  | 0.057                           | 0.174          | 0.001          |
| <b>Kidney function</b>          |          |        |                      |       |          |        |                                 |                |                |          |        |                      |        |          |        |                                 |                |                |
| Uric acid (mg/dL)               | 5.70 ±   | 1.52   | 5.68 ±               | 1.73  | 5.63 ±   | 1.59   | 0.821                           | 0.696          | 0.517          | 6.16 ±   | 1.92   | 6.08 ±               | 1.73   | 6.03 ±   | 1.82   | 0.458                           | 0.512          | 0.763          |
| Creatinine (mg/dL)              | 1.09 ±   | 0.33   | 1.01 ±               | 0.32  | 1.07 ±   | 0.34   | 0.002                           | <0.001         | 0.31           | 1.16 ±   | 0.75   | 1.18 ±               | 0.82   | 1.23 ±   | 0.96   | 0.365                           | 0.197          | 0.28           |
| <b>Liver function</b>           |          |        |                      |       |          |        |                                 |                |                |          |        |                      |        |          |        |                                 |                |                |
| AST (U/L)                       | 27.10 ±  | 10.21  | 28.69 ±              | 9.19  | 28.89 ±  | 8.68   | 0.087                           | 0.494          | 0.015          | 28.34 ±  | 18.15  | 29.80 ±              | 16.63  | 28.11 ±  | 11.79  | 0.136                           | 0.414          | 0.92           |
| ALT (U/L)                       | 18.35 ±  | 10.13  | 21.04 ±              | 10.18 | 23.30 ±  | 12.43  | 0.001                           | 0.014          | <0.001         | 22.86 ±  | 26.58  | 21.22 ±              | 11.18  | 21.75 ±  | 11.92  | 0.113                           | 0.886          | 0.271          |
| <b>Nutritional status</b>       |          |        |                      |       |          |        |                                 |                |                |          |        |                      |        |          |        |                                 |                |                |
| Albumin (g/dL)                  | 4.28 ±   | 0.27   | 4.18 ±               | 0.32  | 4.19 ±   | 0.32   | 0.002                           | 0.726          | 0.02           | 4.17 ±   | 0.41   | 4.21 ±               | 0.42   | 4.15 ±   | 0.47   | 0.286                           | 0.309          | 0.756          |
| <b>Vitamin D status</b>         |          |        |                      |       |          |        |                                 |                |                |          |        |                      |        |          |        |                                 |                |                |
| Total 25-OH Vit D (ng/mL)       | 23.93 ±  | 9.43   | 23.17 ±              | 8.64  | 23.69 ±  | 9.56   | 0.067                           | 0.197          | 0.821          | 21.83 ±  | 9.09   | 21.52 ±              | 8.71   | 21.03 ±  | 8.02   | 0.38                            | 0.22           | 0.082          |
| <b>Zinc status</b>              |          |        |                      |       |          |        |                                 |                |                |          |        |                      |        |          |        |                                 |                |                |
| Zinc (µg/L)                     | 750.28 ± | 169.61 | 695.72 ±             | 97.62 | 730.09 ± | 146.99 | 0.017                           | 0.042          | 0.846          | 829.42 ± | 170.44 | 778.34 ±             | 143.48 | 711.10 ± | 142.16 | 0.024                           | <0.001         | <0.001         |
| <b>Hematology</b>               |          |        |                      |       |          |        |                                 |                |                |          |        |                      |        |          |        |                                 |                |                |
| RBCs (10 <sup>6</sup> /µL)      | 4.27 ±   | 0.59   | 4.27 ±               | 0.56  | 4.29 ±   | 0.60   | 0.987                           | 0.658          | 0.748          | 4.40 ±   | 0.73   | 4.34 ±               | 0.76   | 4.41 ±   | 0.73   | 0.116                           | 0.119          | 0.804          |
| WBCs (10 <sup>3</sup> /µL)      | 6.71 ±   | 3.77   | 6.87 ±               | 5.19  | 7.48 ±   | 6.76   | 0.925                           | 0.004          | 0.044          | 6.44 ±   | 1.74   | 6.59 ±               | 1.60   | 6.52 ±   | 1.60   | 0.375                           | 0.66           | 0.687          |
| Hemoglobin (g/dL)               | 12.94 ±  | 1.69   | 12.88 ±              | 1.70  | 12.85 ±  | 1.84   | 0.545                           | 0.734          | 0.484          | 13.04 ±  | 2.17   | 12.93 ±              | 2.20   | 12.98 ±  | 2.16   | 0.319                           | 0.744          | 0.681          |
| Hematocrit (%)                  | 38.90 ±  | 4.84   | 39.17 ±              | 4.67  | 39.42 ±  | 5.15   | 0.364                           | 0.378          | 0.174          | 40.12 ±  | 6.27   | 39.85 ±              | 6.36   | 40.06 ±  | 6.12   | 0.425                           | 0.67           | 0.902          |
| Platelets (10 <sup>3</sup> /µL) | 225.70 ± | 72.70  | 226.32 ±             | 78.39 | 232.70 ± | 77.63  | 0.760                           | 0.173          | 0.184          | 229.36 ± | 73.39  | 227.57 ±             | 72.76  | 227.76 ± | 70.47  | 0.653                           | 0.97           | 0.8            |

|                     |               |               |               |       |       |        |              |              |              |       |        |       |
|---------------------|---------------|---------------|---------------|-------|-------|--------|--------------|--------------|--------------|-------|--------|-------|
| MCH (pg)            | 30.54 ± 3.27  | 30.35 ± 3.22  | 30.13 ± 3.27  | 0.022 | 0.021 | 0.002  | 29.86 ± 2.81 | 29.97 ± 2.74 | 29.60 ± 2.58 | 0.051 | 0.001  | 0.049 |
| MCHC (g/dL)         | 33.01 ± 1.14  | 32.87 ± 1.13  | 32.56 ± 1.10  | 0.100 | 0.009 | <0.001 | 32.19 ± 1.22 | 32.41 ± 1.09 | 32.34 ± 1.10 | 0.012 | 0.768  | 0.151 |
| MCV (fL)            | 92.37 ± 8.11  | 92.22 ± 8.23  | 92.43 ± 8.33  | 0.862 | 0.765 | 0.562  | 92.64 ± 6.91 | 92.33 ± 6.77 | 91.41 ± 6.79 | 0.056 | <0.001 | 0.001 |
| Neutrophil Seg. (%) | 59.89 ± 10.98 | 59.60 ± 11.13 | 61.32 ± 12.69 | 0.694 | 0.120 | 0.047  | 58.67 ± 9.97 | 58.85 ± 9.49 | 59.06 ± 9.33 | 0.731 | 0.838  | 0.717 |
| Lymphocytes (%)     | 29.74 ± 10.80 | 29.82 ± 10.83 | 28.03 ± 11.54 | 0.745 | 0.081 | 0.035  | 29.96 ± 9.03 | 29.74 ± 8.43 | 30.04 ± 8.76 | 0.682 | 0.72   | 0.866 |
| Monocytes (%)       | 6.77 ± 1.59   | 6.82 ± 1.61   | 6.84 ± 1.53   | 0.687 | 0.731 | 0.954  | 6.65 ± 1.60  | 6.67 ± 1.48  | 6.67 ± 1.61  | 0.981 | 0.992  | 0.762 |
| Eosinophils (%)     | 2.95 ± 2.41   | 3.12 ± 2.69   | 2.83 ± 2.43   | 0.378 | 0.209 | 0.559  | 4.14 ± 5.25  | 4.14 ± 3.99  | 3.64 ± 2.55  | 0.096 | 0.823  | 0.261 |
| Basophils (%)       | 0.66 ± 0.32   | 0.64 ± 0.30   | 0.64 ± 0.37   | 0.434 | 0.456 | 0.146  | 0.58 ± 0.32  | 0.60 ± 0.30  | 0.59 ± 0.32  | 0.269 | 0.816  | 0.854 |
| RDW-CV (%)          | 13.85 ± 1.36  | 13.79 ± 1.37  | 13.76 ± 1.29  | 0.181 | 0.874 | 0.254  | 13.81 ± 1.94 | 13.68 ± 1.75 | 13.56 ± 1.65 | 0.089 | 0.907  | 0.25  |

Data are expressed as the mean ± standard deviation. The Shapiro-Wilk test was used to test determine the normality of the population. Data were compared by a paired *t*-test, *t*-test, or Wilcoxon signed-rank test.

ALT, alanine aminotransferase; AST, aspartate aminotransferase; MCH, mean corpuscular hemoglobin; MCHC, mean corpuscular hemoglobin concentration; MCV, mean corpuscular volume; RBCs, red blood cells; TC, total cholesterol; TIBC, total iron-binding capacity; WBCs, white blood cells; RDW-CV: red blood cell distribution width.

Supplementary Table S3. Effects of nutritional supplement drink (NSD) on the MOS 36-Item Short Form Health Survey (SF)-36 questionnaire of older nursing home residents at risk of malnutrition.

|     | NSD (N=50) |   |       |       |   |       |                                     | NE (N=39) |   |      |       |   |      |                                     | NSD × NE |        |
|-----|------------|---|-------|-------|---|-------|-------------------------------------|-----------|---|------|-------|---|------|-------------------------------------|----------|--------|
|     | Baseline   |   |       | End   |   |       | <i>p</i> value<br>Baseline<br>× End | Baseline  |   |      | End   |   |      | <i>p</i> value<br>Baseline<br>× End | Baseline | End    |
| PF  | 76.83      | ± | 21.36 | 84.50 | ± | 18.47 | 0.001                               | 86.41     | ± | 3.24 | 85.25 | ± | 3.80 | 0.020                               | 0.328    | 0.009  |
| RP  | 67.22      | ± | 16.21 | 69.38 | ± | 17.55 | 0.345                               | 73.08     | ± | 4.57 | 73.72 | ± | 2.93 | 0.392                               | 0.061    | 0.306  |
| BP  | 87.96      | ± | 14.92 | 92.96 | ± | 10.96 | 0.061                               | 96.21     | ± | 7.05 | 94.62 | ± | 8.35 | 0.359                               | 0.006    | 0.614  |
| GH  | 57.90      | ± | 15.74 | 61.94 | ± | 13.98 | 0.059                               | 49.54     | ± | 4.52 | 49.21 | ± | 4.53 | 0.800                               | 0.002    | <0.001 |
| VT  | 62.25      | ± | 14.99 | 69.34 | ± | 18.00 | 0.007                               | 55.13     | ± | 4.27 | 54.17 | ± | 5.61 | 0.392                               | 0.005    | <0.001 |
| SF  | 78.75      | ± | 19.60 | 83.50 | ± | 17.21 | 0.057                               | 87.50     | ± | 6.41 | 85.90 | ± | 7.13 | 0.236                               | 0.068    | 0.813  |
| RE  | 69.79      | ± | 17.67 | 73.00 | ± | 11.49 | 0.368                               | 74.36     | ± | 4.00 | 73.93 | ± | 3.91 | 0.157                               | 0.145    | 0.451  |
| MH  | 65.10      | ± | 13.42 | 71.60 | ± | 16.64 | 0.003                               | 59.10     | ± | 3.60 | 59.49 | ± | 3.40 | 0.637                               | 0.022    | <0.001 |
| PCS | 51.23      | ± | 6.09  | 53.03 | ± | 5.04  | 0.015                               | 54.04     | ± | 1.33 | 53.67 | ± | 1.22 | 0.201                               | 0.011    | 0.511  |
| MCS | 45.77      | ± | 7.52  | 48.12 | ± | 7.00  | 0.020                               | 43.69     | ± | 1.27 | 43.57 | ± | 1.47 | 0.497                               | 0.026    | 0.002  |

Data are expressed as the mean ± standard deviation. The Shapiro-Wilk test was used to determine the normality of the population. Data were compared by a *t*-test, Mann-Whitney U test, paired *t*-test, or Wilcoxon signed-rank test. NE, nutritional education; PF, physical functioning; RP, role limitations of physical problems; BP, bodily pain; GH, general health; VT, vitality; SF, social functioning; RE, role emotional; MH, role emotional; PCS, physical component score; MCS, mental component score.

Supplementary Table S4. Changes in the MOS 36-Item Short Form Health Survey (SF)-36 questionnaire score after 12 weeks of nutritional supplement drink (NSD) in older nursing home residents at risk of malnutrition.

|     | NSD ( <i>N</i> =50)  |   |       | NE ( <i>N</i> =39)   |   |       | NSD × NE       |
|-----|----------------------|---|-------|----------------------|---|-------|----------------|
|     | Δ week 12 - baseline |   |       | Δ week 12 - baseline |   |       | <i>p</i> value |
| PF  | 7.67                 | ± | 14.23 | -1.15                | ± | 2.92  | <0.001         |
| RP  | 3.50                 | ± | 22.84 | 0.64                 | ± | 4.92  | 0.170          |
| BP  | 5.00                 | ± | 17.86 | -1.59                | ± | 10.20 | 0.053          |
| GH  | 4.04                 | ± | 14.79 | -0.33                | ± | 5.21  | 0.128          |
| VT  | 7.09                 | ± | 17.53 | -0.96                | ± | 6.65  | 0.011          |
| SF  | 4.75                 | ± | 17.84 | -1.60                | ± | 8.20  | 0.011          |
| RE  | 6.00                 | ± | 23.27 | -0.43                | ± | 1.86  | 0.089          |
| MH  | 6.50                 | ± | 13.41 | 0.38                 | ± | 3.87  | 0.002          |
| PCS | 1.81                 | ± | 4.84  | -0.37                | ± | 1.77  | 0.005          |
| MCS | 2.35                 | ± | 6.90  | -0.12                | ± | 1.63  | 0.018          |

Data were calculated by the value of week 12 – the baseline and are expressed as the mean ± standard deviation. The Shapiro-Wilk test was used to determine the normality of the population. Data were compared by a *t*-test or Mann-Whitney U test. NE, nutritional education; PF, physical functioning; RP, role limitations of physical problems; BP, bodily pain; GH, general health; VT, vitality; SF, social functioning; RE, role emotional; MH, role emotional; PCS, physical component score; MCS, mental component score.

Supplementary Table S5. Correlations of components of the MOS 36-Item Short Form Health Survey (SF)-36 questionnaire with the nutritional status, physical performance, vitamin D, and nutritional supplement drink (NSD).

|     | MNA-SF |         | BMI    |         | Grip strength |         | Walking speed |         | Albumin |         | Vitamin D |         | NSD    |          |
|-----|--------|---------|--------|---------|---------------|---------|---------------|---------|---------|---------|-----------|---------|--------|----------|
|     | r      | p value | r      | p value | r             | p value | r             | p value | r       | p value | r         | p value | r      | p- value |
| PF  | 0.371  | <0.001  | 0.111  | 0.302   | 0.145         | 0.175   | 0.493         | <0.001  | 0.114   | 0.286   | -0.029    | 0.787   | 0.278  | 0.008    |
| RP  | -0.089 | 0.408   | -0.090 | 0.403   | 0.151         | 0.158   | 0.079         | 0.462   | 0.013   | 0.907   | -0.099    | 0.354   | -0.109 | 0.309    |
| BP  | 0.029  | 0.787   | 0.036  | 0.739   | -0.132        | 0.217   | 0.055         | 0.609   | 0.105   | 0.326   | -0.169    | 0.113   | -0.054 | 0.617    |
| GH  | 0.334  | 0.001   | -0.076 | 0.477   | 0.256         | 0.015   | 0.300         | 0.004   | 0.235   | 0.026   | 0.046     | 0.668   | 0.528  | <0.001   |
| VT  | 0.299  | 0.004   | -0.052 | 0.627   | 0.071         | 0.507   | 0.113         | 0.292   | 0.027   | 0.799   | 0.046     | 0.670   | 0.457  | <0.001   |
| SF  | -0.084 | 0.436   | -0.090 | 0.401   | 0.014         | 0.894   | 0.138         | 0.198   | -0.016  | 0.884   | 0.047     | 0.662   | 0.025  | 0.815    |
| RE  | -0.123 | 0.251   | -0.186 | 0.081   | 0.048         | 0.658   | 0.093         | 0.389   | 0.127   | 0.235   | 0.008     | 0.942   | 0.080  | 0.454    |
| MH  | 0.271  | 0.010   | -0.095 | 0.377   | 0.002         | 0.988   | 0.065         | 0.547   | 0.051   | 0.632   | 0.096     | 0.372   | 0.374  | <0.001   |
| PCS | 0.141  | 0.187   | 0.098  | 0.363   | 0.132         | 0.218   | 0.479         | <0.001  | 0.106   | 0.322   | -0.156    | 0.144   | 0.070  | 0.514    |
| MCS | 0.065  | 0.546   | -0.162 | 0.129   | -0.040        | 0.710   | -0.049        | 0.646   | -0.005  | 0.964   | 0.127     | 0.236   | 0.332  | 0.001    |

Data were analyzed by Spearman's rank correlation and were compared to each item in the SF-36 questionnaire ( $N=89$ ). BMI, body-mass index; MNA-SF, Mini-Nutritional Assessment Short Form; PF, physical functioning; RP, role limitations of physical problems; BP, bodily pain; GH, general health; VT, vitality; SF, social functioning; RE, role emotional; MH, role emotional; PCS, physical component score; MCS, mental component score.

Supplementary Table S6. Correlations of albumin levels with muscle mass, physical function, frailty, and the nutrition status.

|                     | Baseline |                | 6 <sup>th</sup> week |                | End      |                |
|---------------------|----------|----------------|----------------------|----------------|----------|----------------|
|                     | <i>r</i> | <i>p</i> value | <i>r</i>             | <i>p</i> value | <i>r</i> | <i>p</i> value |
| Calf circumference  | 0.345    | <0.001         | 0.260                | 0.007          | 0.289    | 0.003          |
| ASMI                | 0.289    | 0.002          | 0.185                | 0.056          | 0.190    | 0.050          |
| Grip strength       | 0.304    | 0.001          | 0.023                | 0.815          | 0.242    | 0.012          |
| Walking speed (m/s) | 0.361    | <0.001         | 0.192                | 0.047          | 0.210    | 0.030          |
| SOF                 | -0.019   | 0.848          | 0.077                | 0.429          | 0.157    | 0.107          |
| MNA-SF              | 0.221    | 0.022          | 0.160                | 0.101          | 0.233    | 0.016          |

Data were analyzed by Spearman's rank correlation and were compared to the albumin level ( $N=107$ ). ASMI, appendicular skeletal muscle index; SOF, study of osteoporotic fractures; MNA-SF, Mini-Nutritional Assessment Short Form.
